# Supplementary material
Source: PubMed Central journal article supplement (PMC3481176)

# Scott, et al., Fig. S1

a

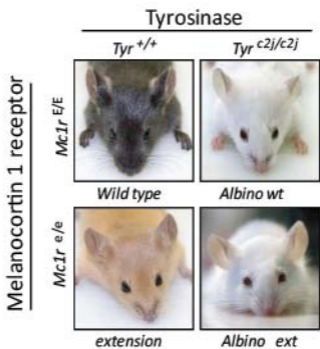

b

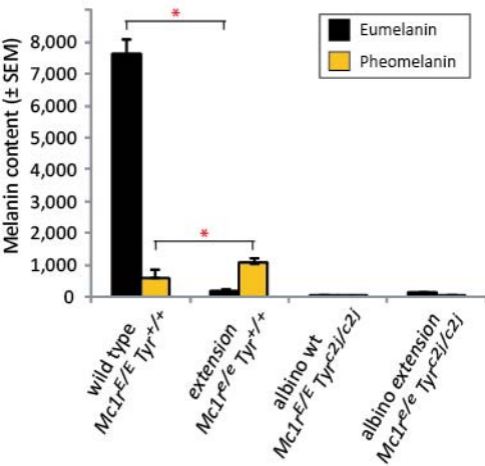

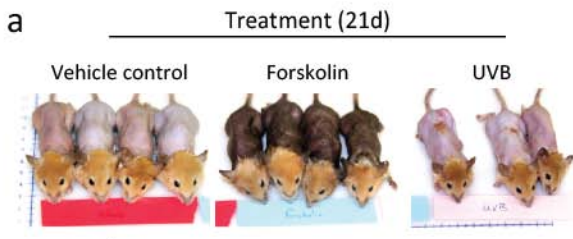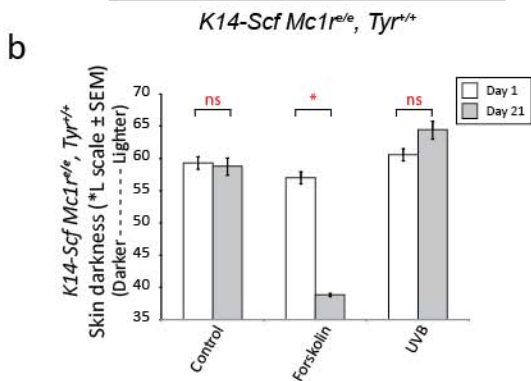

**c** *K14-Scf albino extension (Mc1<sup>re/e</sup> Tyr<sup>c-2j/c-2j</sup>)*

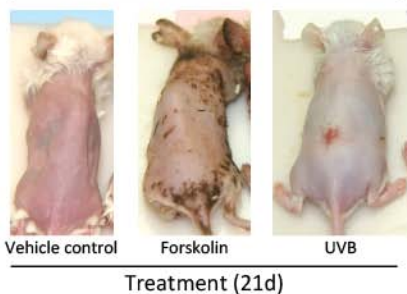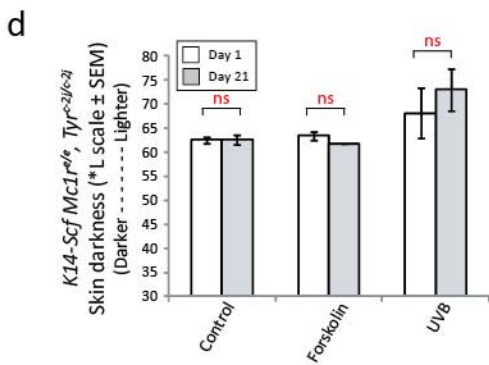

Treatment (21d)

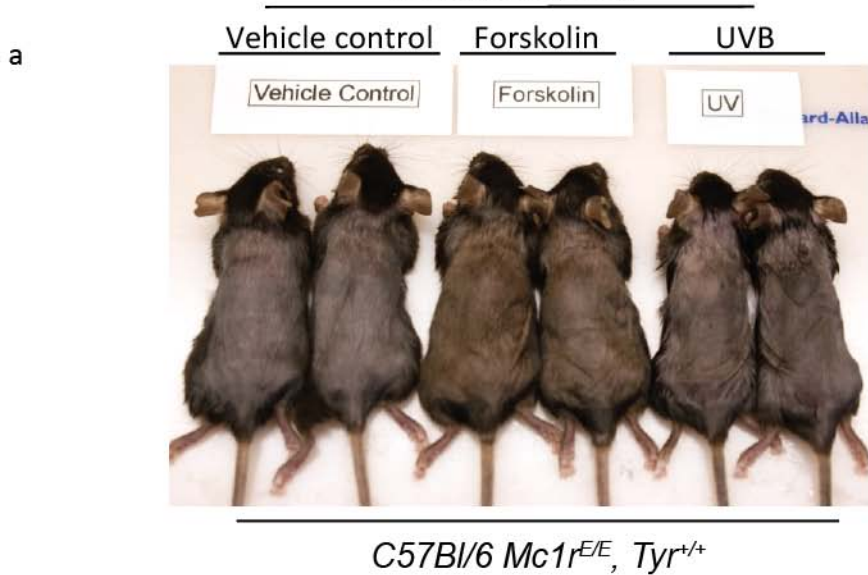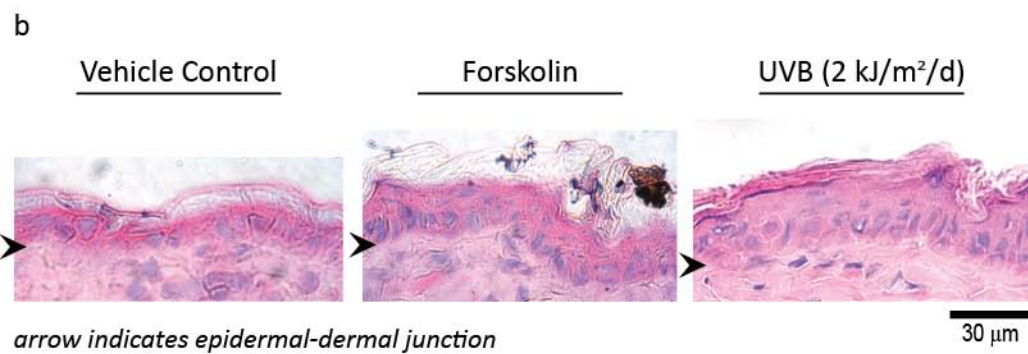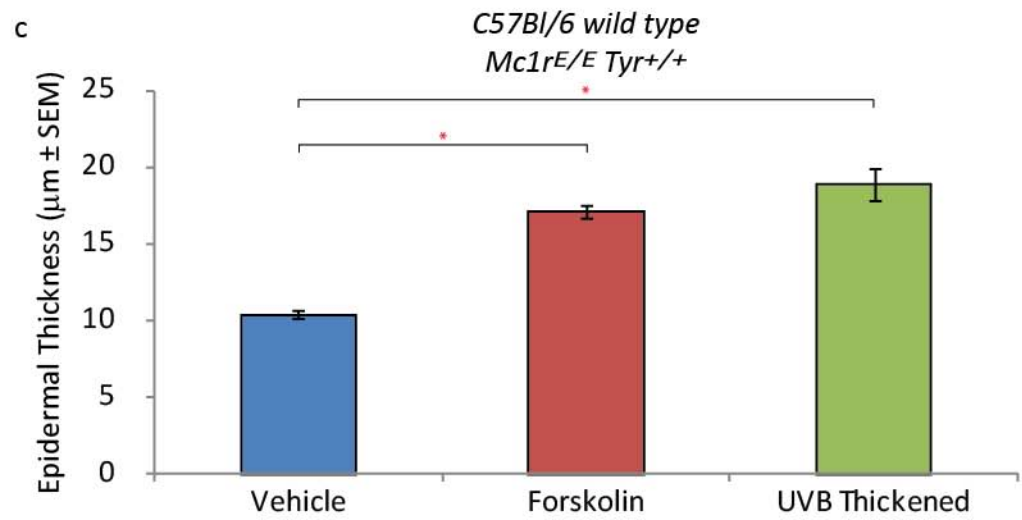

*Scott, et al., Fig. S4*

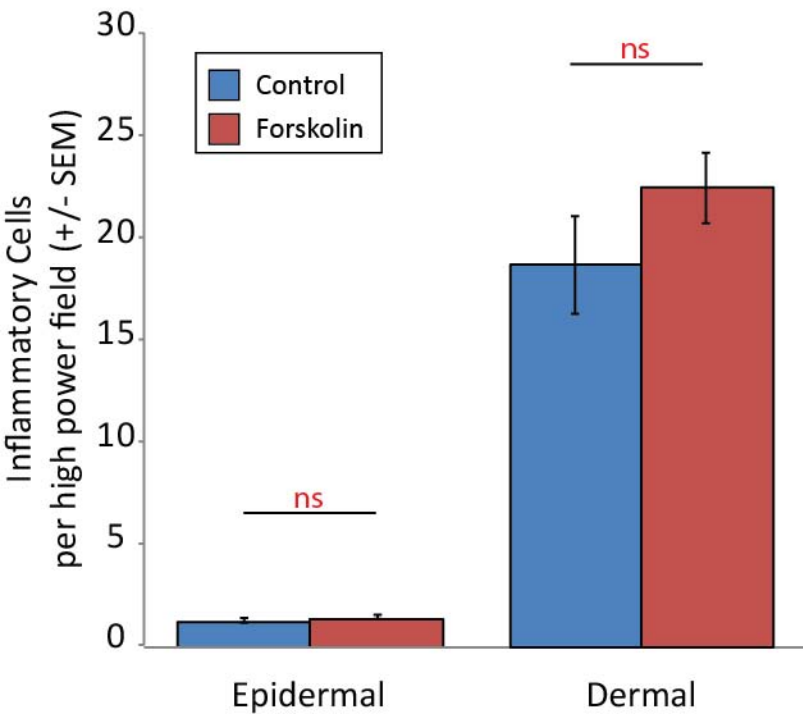

*Scott, et al., Fig. S5*

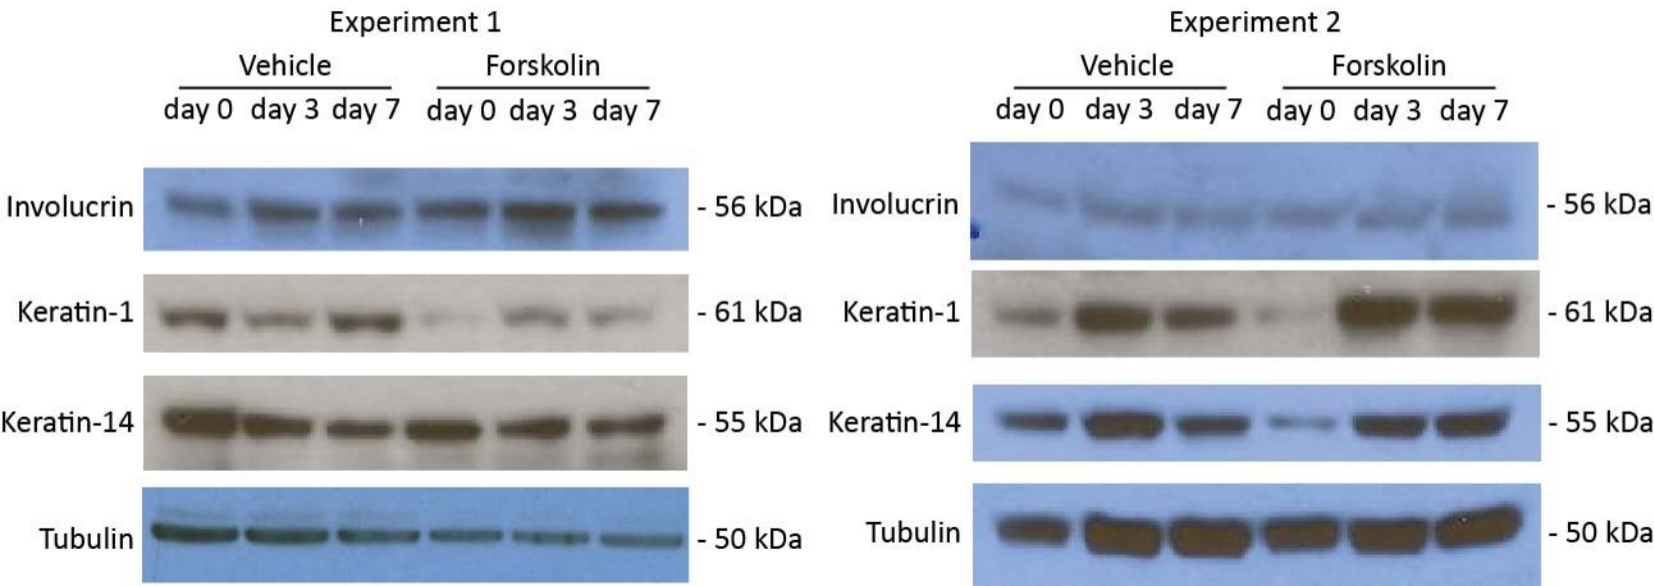

# Scott, et al., Fig. S6

a.

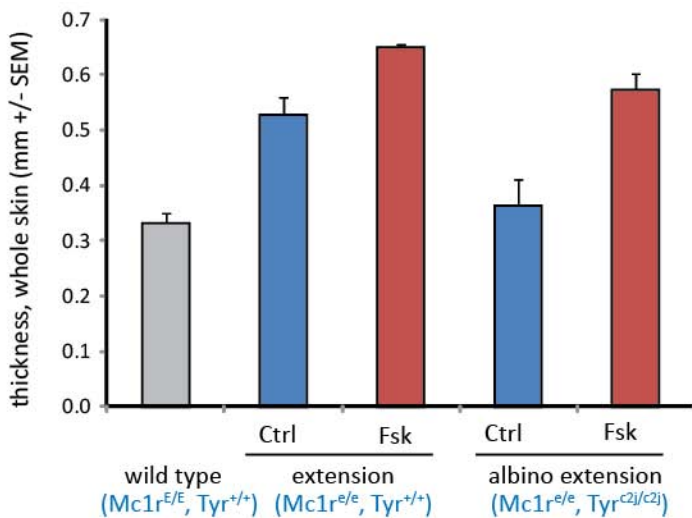

b.

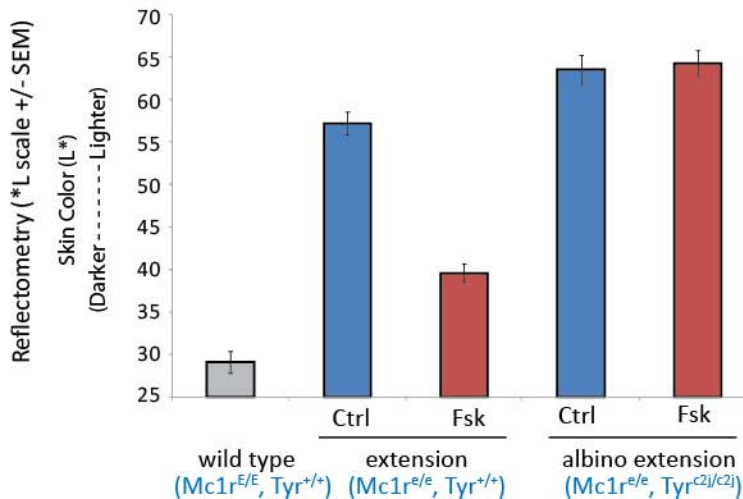

Supplement: NIHMS402683-supplement-Supp_Fig_S1-S6.pdf [file NIHMS402683-supplement-Supp_Fig_S1-S6.pdf]
